# Supplementary material for: Association between vitamin D receptorBsmI, FokI, andCdx2polymorphisms and osteoporosis risk: an updated meta-analysis
Source: Oxford University Press journal article supplement (doi:10.1042/bsr20201200), 2020-07-01
Supplement: bsr-2020-1200_supp.pdf [file bsr-2020-1200_supp.pdf]

**Supplementary Table 1. Scale for quality assessment of molecular association studies**

| Criterion                                                                                                            | Score |
|----------------------------------------------------------------------------------------------------------------------|-------|
| Source of case                                                                                                       |       |
| Selected from population                                                                                             | 2     |
| Selected from hospital                                                                                               | 1     |
| Not described                                                                                                        | 0     |
| Source of control                                                                                                    |       |
| Population-based                                                                                                     | 3     |
| Blood donors or volunteers                                                                                           | 2     |
| Hospital-based                                                                                                       | 1     |
| Not described                                                                                                        | 0     |
| Ascertainment of osteoporosis                                                                                        |       |
| WHO                                                                                                                  | 2     |
| Diagnosis of osteoporosis by patient medical record                                                                  | 1     |
| Not described                                                                                                        | 0     |
| Ascertainment of control                                                                                             |       |
| Controls were tested to screen out                                                                                   | 2     |
| Controls were subjects who did not report osteoporosis, no objective testing                                         | 1     |
| Not described                                                                                                        | 0     |
| Matching                                                                                                             |       |
| Controls matched with cases by age and sex                                                                           | 2     |
| Controls matched with cases only by age or sex                                                                       | 1     |
| Not matched or not described                                                                                         | 0     |
| Genotyping examination                                                                                               |       |
| Genotyping done blindly and quality control                                                                          | 2     |
| Only genotyping done blindly or quality control                                                                      | 1     |
| Unblinded and without quality control                                                                                | 0     |
| Specimens used for determining genotypes                                                                             |       |
| Blood cells or normal tissues                                                                                        | 1     |
| Tumor tissues or exfoliated cells of tissue                                                                          | 0     |
| HWE                                                                                                                  |       |
| HWE in the control group                                                                                             | 1     |
| Hardy-Weinberg disequilibrium in the control group                                                                   | 0     |
| Association assessment                                                                                               |       |
| Assess association between genotypes and osteoporosis with appropriate statistics and adjustment for confounders     | 2     |
| Assess association between genotypes and osteoporosis with appropriate statistics without adjustment for confounders | 1     |
| Inappropriate statistics used                                                                                        | 0     |
| Total sample size                                                                                                    |       |
| >500                                                                                                                 | 3     |
| 200-500                                                                                                              | 2     |
| <200                                                                                                                 | 1     |
| HWE: Hardy-Weinberg equilibrium                                                                                      |       |
